# Supplementary material for: GPR17: Molecular modeling and dynamics studies of the 3-D structure and purinergic ligand binding features in comparison with P2Y receptors
Source: PubMed Central journal article supplement (PMC2443813; doi:10.1186/1471-2105-9-263), 2008-06-04

## **Additional file Figures**

### **GPR17: Molecular modeling and dynamics studies of the 3-D structure and purinergic ligand binding features in comparison with P2Y receptors**

Chiara Parravicini, Graziella Raghino, Maria P Abbracchio, Piercarlo Fantucci

#### **Table of contents**

|                                 |    |
|---------------------------------|----|
| Additional file: Figure 1.....  | 2  |
| Additional file: Figure 2.....  | 4  |
| Additional file: Figure 3.....  | 5  |
| Additional file: Figure 4.....  | 6  |
| Additional file: Figure 5.....  | 7  |
| Additional file: Figure 6.....  | 8  |
| Additional file: Figure 7.....  | 9  |
| Additional file: Figure 8.....  | 10 |
| Additional file: Figure 9.....  | 11 |
| Additional file: Figure 10..... | 13 |
| Additional file: Figure 11..... | 14 |
| Additional file: Figure 12..... | 15 |

**Additional file: Figure 1. Multiple alignment of the sequences of bovine rhodopsin (*bRh*), P2Y, CysLT<sub>1</sub>, CysLT<sub>2</sub> receptors and *hGPR17*. The cysteines involved in the formation of the two assumed disulphide bridges are highlighted in red; the H-X-X-R/K motif typical of all the P2Y and CysLTs receptor subtypes and conserved in GPR17 is highlighted in green.**

|            | NT                                                           | TM1                                       | IL1 |
|------------|--------------------------------------------------------------|-------------------------------------------|-----|
| <i>bRh</i> | 26 APOYYLAEP-----                                            | WQFSMLAAYMFLIMLGFPINFLTLYVTVQHK--K-LRTP   |     |
| P2Y1       | 40 FKCALTKTG-----                                            | FQFYLLPAVYIILVFIIGFLGNSVAIWMFVPHM--K-PWSG |     |
| P2Y2       | 23 YRCRF-NED-----                                            | FKYVLLPVSYGVVCVLGLCLNAVALYIFLCRL--K-TWNA  |     |
| P2Y4       | 25 LDCWF-DED-----                                            | FKFILLPVSYAVVFLVGLGLNAPTLLWLFIFRL--R-PWDA |     |
| P2Y6       | 16 TTCVY-REN-----                                            | FKQLLLPPVYSAVLAAGLPLNICVITQICTSR--R-ALTR  |     |
| P2Y11      | 17 KSCPANFLAAADKLSG-FQGDFLWPILVVEFLVAVASNGLALYRFSIRKQ-R-PWHP |                                           |     |
| P2Y12      | 15 SLCTR-DYK-----                                            | ITQVLFPLLYTVLFFVGLITNGLAMRIFFQIR----SKSN  |     |
| P2Y13      | 13 ERCPD-DTR-----                                            | IVQLVFPALYTVVFLTGILLNNTLALWVVFHIP----SSST |     |
| P2Y14      | 12 ESCSQ-NLL-----                                            | ITQQIIPVLYCMVFIAGILLNGVSGWIFFYVP----SSKS  |     |
| CysLT1     | 12 ATCHDTIDD-----                                            | FRNQVYSTLYSMISVVGFFGNGFVLYVLIKTY--H-KKSA  |     |
| CysLT2     | 29 RNCTIEN-----                                              | FKREFFPIVYLIIFWVGLGNGLSIYVFLQPY--K-KSTS   |     |
| GPR17      | 21 EQCGQ-ETP-----                                            | LENMLFASFYLLDFILALVGNTLALWLFIRDH--K-SGTP  |     |

  

|            | TM2                                      | EL1                      | TM3 |
|------------|------------------------------------------|--------------------------|-----|
| <i>bRh</i> | LNIIILLNLAVALDFMVFGGFTTTLYTSLHGYFVFGPTG  | CNLEGGFFATLGGELALWLSLVVL |     |
| P2Y1       | ISVYMFNLALADFLYVLTLPALIFYFNKTDWIFGDAM    | CKLQRFIFHVNLYGSILFLTCI   |     |
| P2Y2       | STTYMFHLAVSDALYAASLPLLVYYARGDHWPFSTVL    | CKLVRFLFYTNLYCSILFLTCI   |     |
| P2Y4       | TATYMFHLASDITLYVLSLPTLIYYAAHNNHWPFGTEI   | CKFVRFLFYWNLYCSILFLTCI   |     |
| P2Y6       | TAVYTLNLALADLLYACSLPLLIYNYAQGDHWPFGDFAC  | RLVRFLFYANLHGSILFLTCI    |     |
| P2Y11      | AVVFSVQLAVSDLLCALTLPLLAAYLYPPKHWRVGEAAC  | RLERFLFTCNLLGSVIFITCI    |     |
| P2Y12      | FIIIFLKNITVISDLLMILTFPFKILSDAKLGTGPLRTFV | CQVTSVIFYFTMYISISFLGLI   |     |
| P2Y13      | FIIYKNTLVADLIMTLMPLPFKILSDSHLAPWQLRAFV   | CRFSSVIFYETMYVGI VLLGLI  |     |
| P2Y14      | FIIYKNIIVIADFVMSLTFPFKILGDSGLGPWQLNVFV   | CRVSAVLFYVNMVYSIVFFGLI   |     |
| CysLT1     | FQVYMINLAVADLLCVCTPLRVVYVYHKGIIWLFGDFL   | CRLSTYALYVNLYCSIFFMTAM   |     |
| CysLT2     | VNVFMLNLAIISDLLFISTLPFRADYILRGSNWIFGDLA  | CRIMSYSLYVNMYSSIYFLTVL   |     |
| GPR17      | ANVFLMHLAVADLSCVVLVLPTRLVYHFSGNHWPFGELA  | CRLTGFLFYLNMYASIIYFLTCI  |     |

  

|            | IL2                | TM4                                      | EL2  |
|------------|--------------------|------------------------------------------|------|
| <i>bRh</i> | AIERYVVVCKPMSN---- | FRFGENHAIMGVAFTWVMALACAAPPLVGVWSRY-----  | IPEG |
| P2Y1       | SAHRYSGVVYPLKS---  | LGRLKKKNAICISVLVWLVIVVAISPILFYSGTG-----  | VRKN |
| P2Y2       | SVHRCLGVLRPLRS---  | LRWGRARYARRVAGAVWVVLVACQAPVLYFVTTS-----  | ARGG |
| P2Y4       | SVHRYLGICHPLRA---  | LRWGRPRLAGLLCLAVWLVVAGCLVPNLFVVTTS-----  | NKGT |
| P2Y6       | SFQRYLGICHPLAP--   | WHKRGRRAAWLVCAVWLVAVTTQCLPTAIFAATG-----  | IQRN |
| P2Y11      | SLNRYLGIVHPFFA---  | RSHLRPKHAWAVSAAGWVLAALLAMP TLSFSHLK----- | RPQQ |
| P2Y12      | TIDRYQKTRPFKT---   | SNPKNLLGAKILSVVIWAFMFLLSLPNMILTNRQ-----  | PRDK |
| P2Y13      | AFDRFLKIRPLRN---   | IFLKKPVFAKTVSIFIWFFLFFISLPNMILSNKE-----  | ATPS |
| P2Y14      | SFDRIYKIVKPLWT---  | SFIQSVSYSKLLSVIVWMLMLLLAVPNIILTNS-----   | VREV |
| CysLT1     | SFFRCIAIVFPVQN---  | INLVTQKKARFVCGIWFIVILTSSPFLMAKPQK-----   | DEKN |
| CysLT2     | SVVRFAMVHPFRL---   | LHVTSIRSAWILCGI I WILIMASSIMLLDSGSE----- | QNGS |
| GPR17      | SADRFLAIVHPVKS---  | LKLRRPLYAHLACAF LWVVAVAMAPLLVSPQTV-----  | QTNH |

  

|            | TM5                                                          |
|------------|--------------------------------------------------------------|
| <i>bRh</i> | MQCSGIDYYTP---HEE-----TNNESFVIYMFVVHFIIPLIVIFFCYGQL-V        |
| P2Y1       | KTITCYDT--TS---DEY-----LRSYFIYSMCTTVAMFCVPLVLILGCYGLI-V      |
| P2Y2       | -RVTCHDT--SA---PEL-----FSRFVAYSSVMLGLLFAVPFVILVCYVLM-A       |
| P2Y4       | -TVLCHDT--TR---PEE-----FDHYVHFSSAVMGLLFGVPCVLTLCYGLM-A       |
| P2Y6       | -RTVCYDL--SP---PAL-----ATHYMPYGMALTIVIGFLLPFAALLACYCLL-A     |
| P2Y11      | GAGNCSVA--RP---EACIKCLGTADHGLAAYRAYSLVLAGLGCGLPLLLTLAAYGAL-G |
| P2Y12      | NVKKCSFL--KS---EFG-----LVWHEIVNYICQVIFWINFLIVIVCYTLI-T       |
| P2Y13      | SVKKCASL--KG---PLG-----LKWVHQMVNNICQFIFWTVFILMLVYVVI-A       |
| P2Y14      | TQIKCIEL--KS---ELG-----RKWHKASNYIFVAIFWIVFLLLVFYTAI-T        |
| CysLT1     | -NTKCFEP--PQ--DNQT-----KNHVLVLHYVSLFVGFIIIPFVIIIVCYTMI-I     |
| CysLT2     | -VTSCLLE--NL---YK-----IAKLQTMNYIALVVGCLLPFFTLSCYLLI-I        |
| GPR17      | -TVVCLQL--YR---EK-----ASHHALVSLAVAFTFPFITTVTCYLLI-I          |

|        | IL3                                                           | TM6 | EL3 |
|--------|---------------------------------------------------------------|-----|-----|
| bRh    | FTVKEAAAQQQES--ATTQKAEKEVTRMVIIMVIAFLICWLPYAGVAFYIFTHQG-----  |     |     |
| P2Y1   | RALIYKDLD-----NSPLRRKSIYLVIIIVLTVFAVSYIPFHVMKTMNLRARLDF--Q    |     |     |
| P2Y2   | RRLLKPAYGTSG----GLPRAKRKSVRTIIVVLAVFALCFLPFHVTRTLIYYSFRS----- |     |     |
| P2Y4   | RRLYQPLPGSA-----QSSRLRSLRTIIVVLTVFVAVCFVPFHITRTIYYLARL-----   |     |     |
| P2Y6   | CRLCRQDGAEP----VAQERRGKAARMAVVVAAAFVAFVLPFHITKTAYLAVRS----T   |     |     |
| P2Y11  | RAVLRSPGM-----TVAEKLRVAALVASGVALYASSYVPYHIMRVLNVDARR----R     |     |     |
| P2Y12  | KELYRSYVRTRG----VGKVPKVKVNVKVFIIIVAVFFICFVPFHFARIPYTLSQT----R |     |     |
| P2Y13  | KKVYDSYRKSKS----KDRKNNKLEGKVFVVAVVAVFVCFAPFHAFARVPYTHSQT----N |     |     |
| P2Y14  | KKIFKSHLKSSR----NSTSVKKKSSRNIFSIVFVFFVCFVPHYIARIPYTKSQT----E  |     |     |
| CysLT1 | LTLKKSMKK-----NLSSHKKAIGMIMVVTA AFLVSFMPYHIQRTIHLHFLH----N    |     |     |
| CysLT2 | RVLLKVEVPESG----LRVSHRKALTTIIITLIIFFLCFLPYHTLRTVHLTTWK----    |     |     |
| GPR17  | RSRQGLRV-----EKRLKTKAVRMIAIVLAIFLVCFVPHYVNRSVYVVLHYR----S     |     |     |

|        | TM7                                                        | CT |
|--------|------------------------------------------------------------|----|
| bRh    | -----SDFGP----IFMTIPAFFAKTSAVYNPVIYIMMN-----               |    |
| P2Y1   | TPAMC-----AFNDRVY----ATYQVTRGLASLNSCVDPILYFLAG-----        |    |
| P2Y2   | LDLSC-----HTLNAIN----MAYKVTRPLASANSCLDPVLYFLAGQRLVRFARDAKP |    |
| P2Y4   | LEADC-----RVLNIVN----VYKVTTRPLASANSCLDPVLYLLTG-----        |    |
| P2Y6   | PGVPC-----TVLEAFA----AAYKGTTRPFASANSVLDPIIFYFTQ-----       |    |
| P2Y11  | WSTRCP SFADIAQATAALELGPYVGQVMRGLMPLAF CVHPLLYMAAV-----     |    |
| P2Y12  | DVFD C-----TAENTLF----YVKESTLWLTSLNACLDPFIYFFLC-----       |    |
| P2Y13  | NKTD C-----RLQNQLF----IAKETTLFLAATNICMDPLIYIFLC-----       |    |
| P2Y14  | AHYS C-----QSKEILR----YMKEFTLLLSAANVCLDPIIYFFLC-----       |    |
| CysLT1 | ETKPC-----DSVLRMQ----KSVVITLSLAASNCCFDPLLYFFSG-----        |    |
| CysLT2 | -VGL C-----KDRLH----KALVITLALAAANACFNPLLYFFAG-----         |    |
| GPR17  | HGASC-----ATQRILA----LANRITSCLTSLNGALDPIMYFFVA-----        |    |

|        |                            |     |
|--------|----------------------------|-----|
| bRh    | -----KQFRNCMVTTLCCGKNP     | 327 |
| P2Y1   | -----DTFRRRLSRATR KASRR    | 345 |
| P2Y2   | PTG P SPATPARRRLGLRRSDRTDM | 346 |
| P2Y4   | -----DKYRRQLRQLCGGGKPQ     | 327 |
| P2Y6   | -----KKFRRRPHELLQKLTAK     | 322 |
| P2Y11  | -----PSLGCCCRHCPGYRDSW     | 342 |
| P2Y12  | -----KSFRNSLISMLKCPNSA     | 319 |
| P2Y13  | -----KKFTEKLPCMQRKTTA      | 317 |
| P2Y14  | -----QPFREILCKKLHIPLKA     | 316 |
| CysLT1 | -----GNFRKRLSTFRKHSLS      | 316 |
| CysLT2 | -----ENFKDRLKSALRKGHPQ     | 326 |
| GPR17  | -----EKFRHALCNLLCGKRLK     | 318 |

**Additional file: Figure 2. Total energy as a function of time of the entire membrane-receptor system during 10 ns of MD simulation.** After an initial decrease, the total energy of the system kept a stable trend at least for the lasts 3 ns of simulation, indicating that an equilibrium state had been reached.

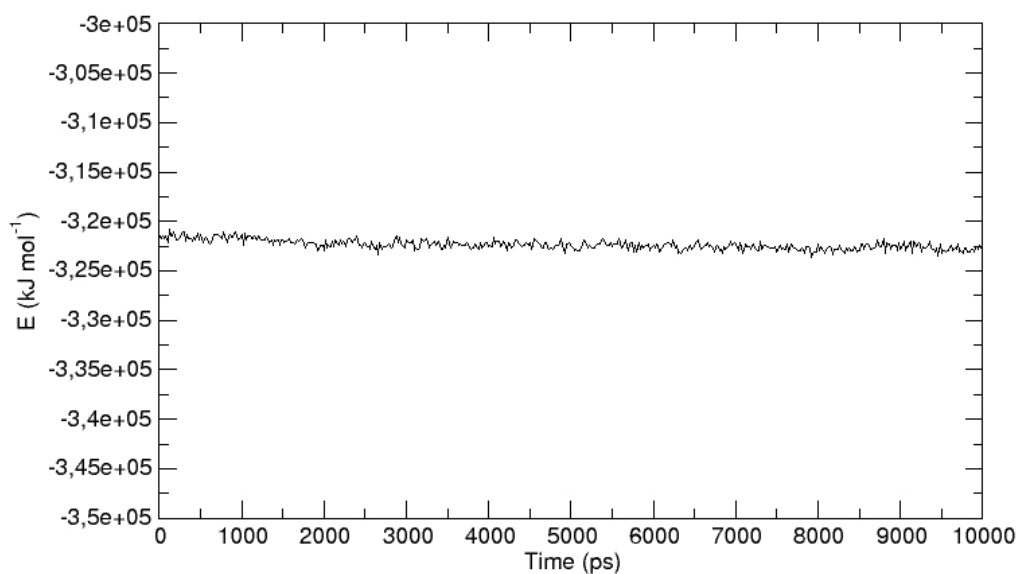

**Additional file: Figure 3. Rmsd of the C- $\alpha$  atoms of the whole protein during the MD simulations performed with or without NOE distance restraints.** The plot shows the rmsd of C- $\alpha$  atoms computed for the two types of simulations performed with NOE distance restraints (Condition 1, 6 ns, black) or without NOE distance restraints (Condition 2, 10 ns, red) (see Methods for more details). After an initial increase, the rmsd values remained stable with time and always below 1.5 Å, indicating that the overall structure of the receptor remained stable and comparable during the course of both types of simulations.

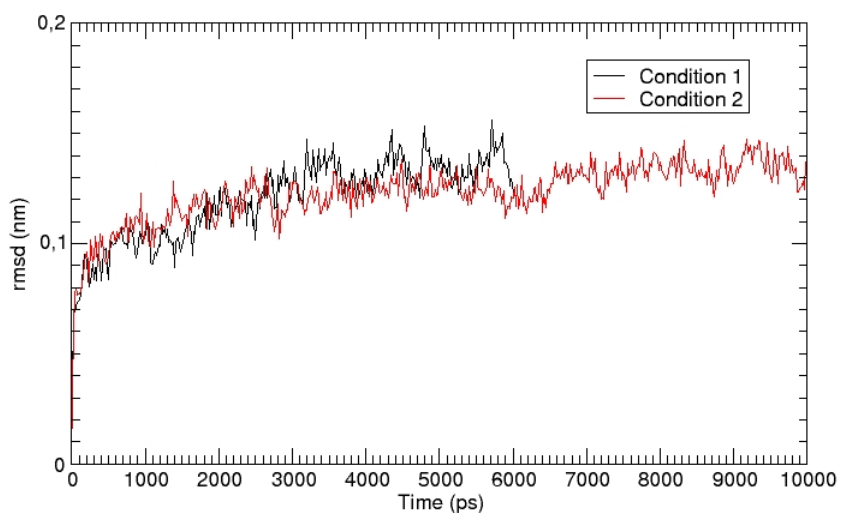

**Additional file: Figure 4. General topology of the refined model of GPR17.** Representative snapshot of the MD trajectory obtained after 10 ns of simulation. Typical secondary structures of the receptor are highlighted:  $\alpha$  -helices are in orange,  $\beta$  -sheets in yellow, turns in green and blue, and loops in turquoise. The nine internal water molecules are represented in red/white as spheres.

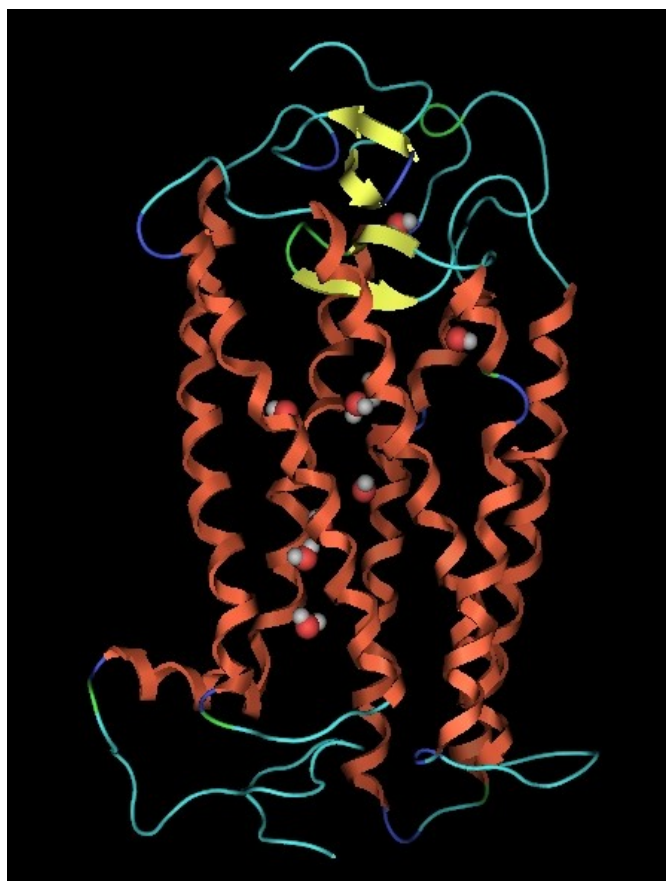

**Additional file: Figure 5. Superposition of the GPR17 models before (in red) and after (in blue) the simulation in lipide-water environment.** With the exception of TM7, which showed a higher mobility with respect to the other TM domains, the arrangement of  $\alpha$ -helices underwent little changes during the MD simulation. Among the loop regions, IL1, IL3 and EL1 were the most rigid, whereas EL2 moved towards the transmembrane domain and displayed a new network of contacts. As expected, the Nt and Ct regions were by far the most mobile regions.

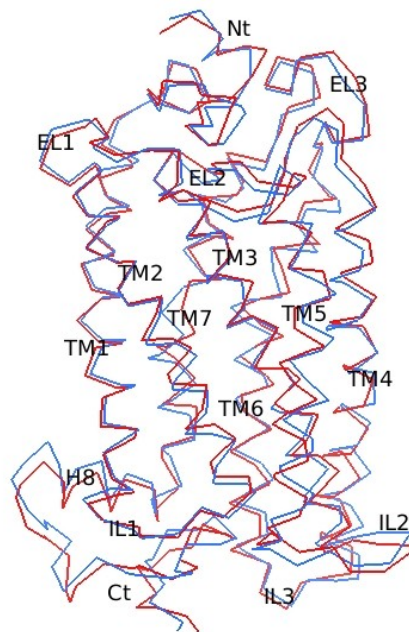

**Additional file: Figure 6. Number of the H-bonds observed during the MD simulations performed with or without NOE distance restraints.** The plots show the number of H-bonds observed during the two types of simulations performed with NOE distance restraints (Condition 1, 6 ns) or without NOE distance restraints (Condition 2, 10 ns) (see Methods for more details). Panel a shows the number of H-bonds computed for the whole receptor protein (yellow and brown lines for Conditions 1 and 2, respectively) and for the receptor backbone (blue and green lines for Conditions 1 and 2, respectively). Panel b shows the H-bond number fluctuations for TM7 only (black and red lines for Conditions 1 and 2, respectively). In all cases, the number of H-bonds was comparable for the two simulations, suggesting a similar dynamic behaviour and stability.

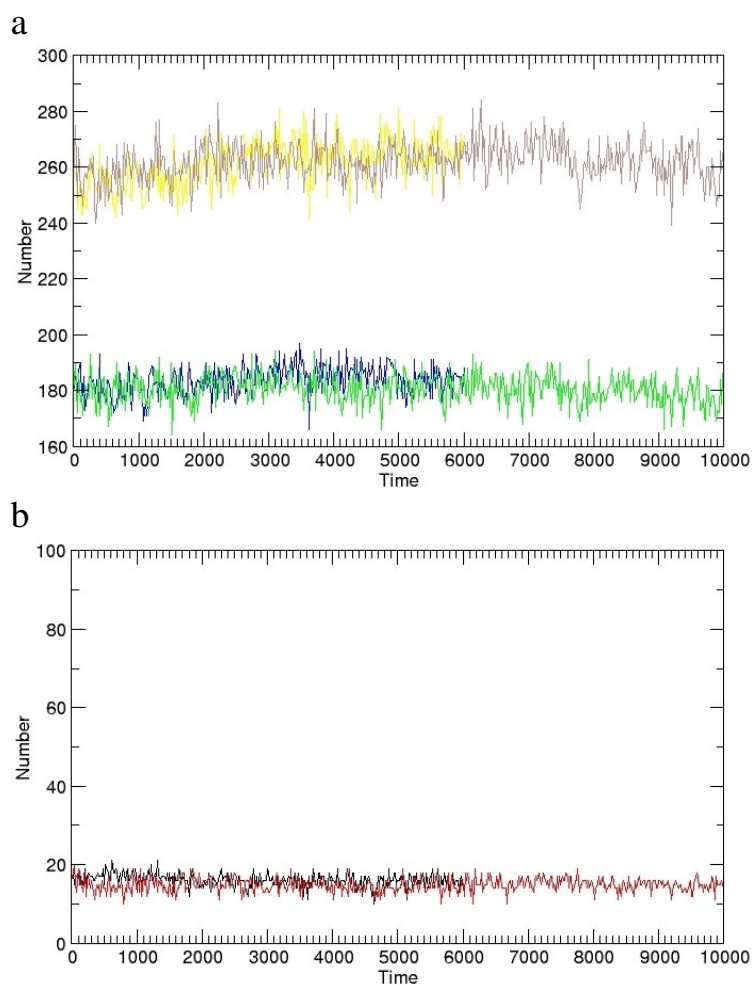



**Additional file: Figure 7. Number of residues with  $\alpha$  -helix conformation observed during the MD simulations performed with or without NOE distance restraints.** The plot shows the number of residues with  $\alpha$  -helix conformation observed during the two types of simulations performed with NOE distance restraints (Condition 1, 6 ns, in black) or without NOE distance restraints (Condition 2, 10 ns, in red) (see Methods for more details). The number of residues showing an  $\alpha$  -helix conformation is very similar in both cases, suggesting that no significant differences in terms of stability and structure of helices arise from the two MD simulation methods.

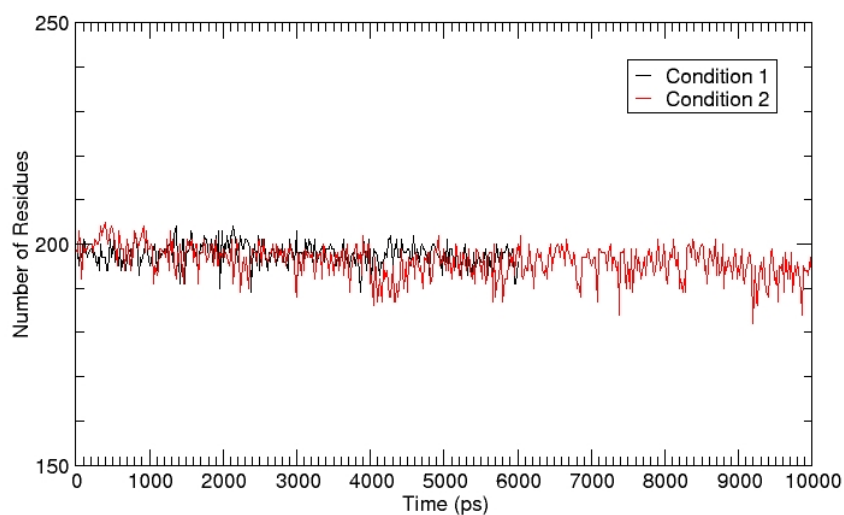

**Additional file: Figure 8. Time evolution of principal H-bonds formed by internal water molecules during the 10 ns of MD simulation of the receptor-membrane system.** Plots show the distances between H-bond donor/acceptor groups of selected internal water molecules and sidechains that formed multiple H-bond interactions during the simulations. Panel a shows the network involving Tyr297, Asn49 and two molecules of water (Wat6809, Wat6816); panel b shows the interaction between Arg87 and Asp77, mediated by two molecule of internal water (Wat6815, Wat6817), and the interaction between Asp41 and water Wat6817. In addition, Arg87 engaged a stable direct electrostatic interaction with Asp41 as shown in Additional file: Figure 9 b.

a

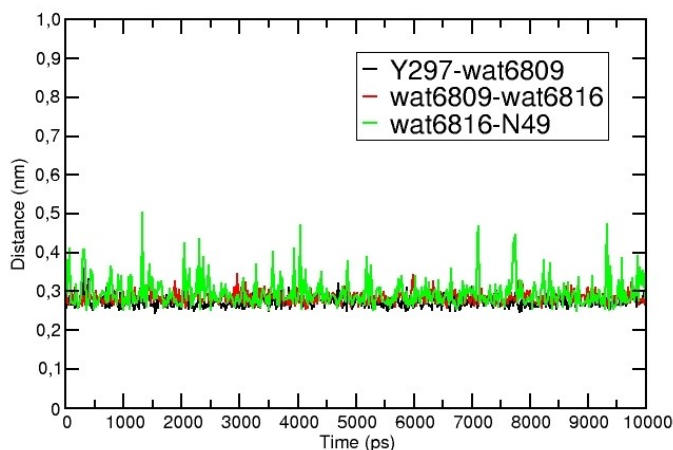

b

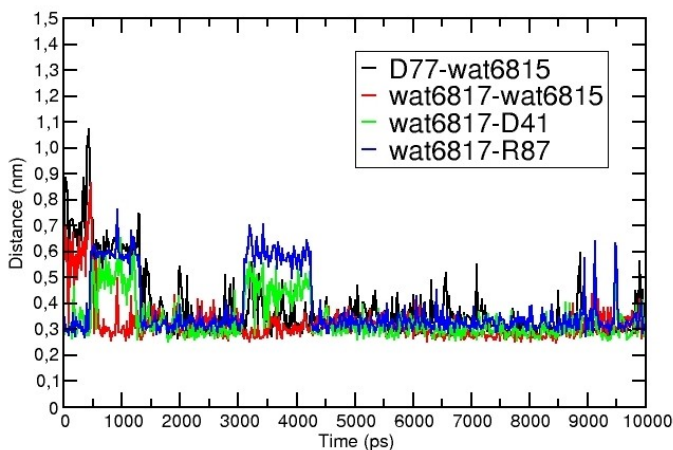

**Additional file: Figure 9. Time evolution of selected distances obtained from 10 ns of simulation of the receptor-membrane system.** Plots show the distances between donor/acceptor groups of residues involved in H-bonds or electrostatic interactions. Panel a plots the H-bonds formed during the MD between Asp77 and the three surrounding asparagine residue: Asn49 (in black), Asn114 (in red) and Asn289 (in green). This multiple interaction defined a network between TM1, TM2, TM3 and TM7. Panel b shows the H-bond observed between Ser118 (TM3) and Asp293 (TM7) (in green). Distance between the guanidine group of Arg87 and carboxyl Asp41 is plotted in black: the two groups carrying opposite charges formed a salt bridge during the MD run. Panel c shows H-bonds formed by residues belonging to EL2 with helices. The sidechain of Tyr185 pointed toward the transmembrane space and engaged a stable interaction with Tyr112 (TM3) (in black); Gln183 oriented its sidechain inside the helical bundle and could alternatively interact with both Tyr116 (TM3) and Ser196 (TM5). This double chance of Gln183 could explain the high level of fluctuation of the observed H-bond lengths for both Gln183-Tyr116 (in red) and Gln183-Ser196 (in blue).

a

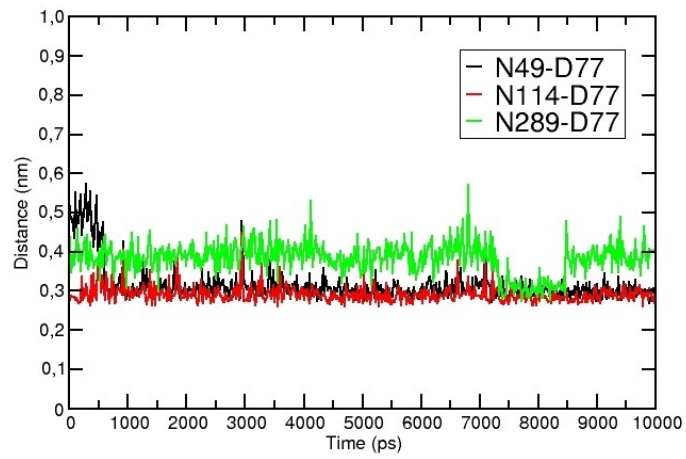

b

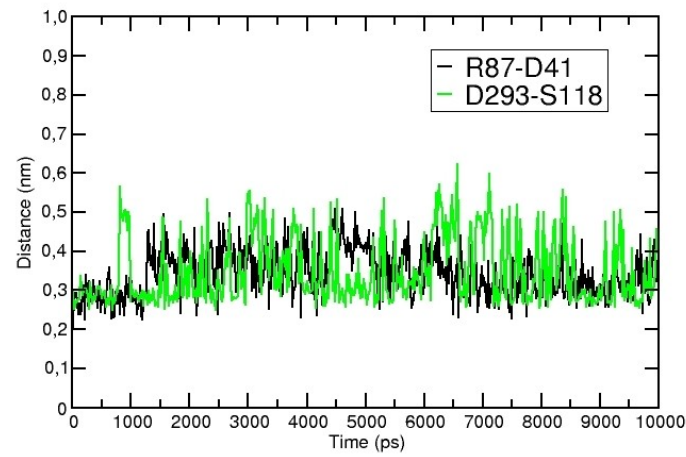

c

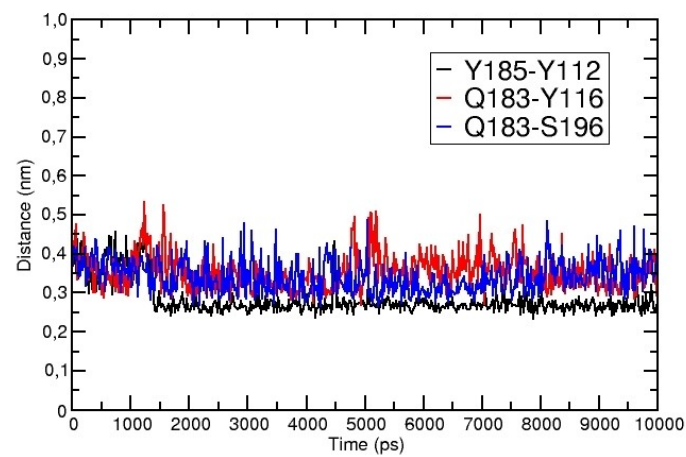

**Additional file: Figure 10. Time evolution of the main interactions occurring between GPR17 and UDP during 3 ns of MD simulation.** Plots show the distances between donor/acceptor groups of atoms involved in H-bonds or electrostatic interactions within the ligand-receptor complex. Panel a plots the distances between the guanidine group of Arg255 (TM6) and both the  $\alpha$  and  $\beta$  phosphates (in black and red, respectively). Distances were between 4 and 5 Å, indicating the electrostatic interaction between Arg255 and the phosphate moiety as the main driving force for ligand binding. In Panel b other possible interactions between the phosphate chain and residues belonging to the binding pocket are reported. The sidechains of Tyr185 (EL2), Tyr112 (TM5), His252 (TM6) and Tyr262 (TM6) were likely to engage H-bonds with the  $\alpha$  -phosphate, while, during the MD run, Gln183 pointed its sidechain to the phosphate chain. Panel c plots the principal H-bonds observed between the uridine moiety and GPR17: interaction engaged by the 4-O group of uracil ring with Tyr38 (TM2) is reported in black, while its interaction with Ser283 (TM7) is reported in red.

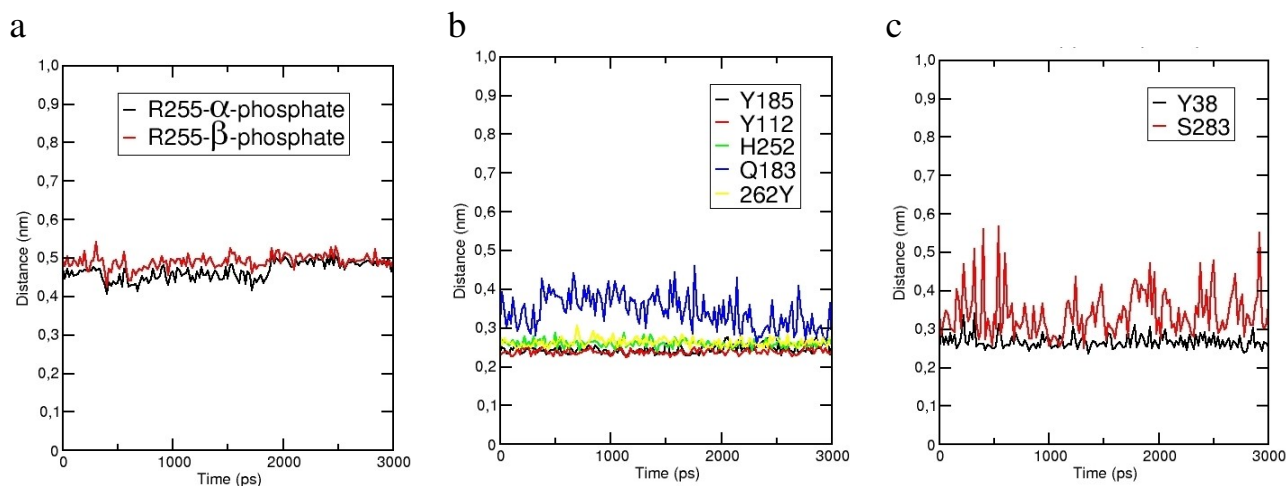

**Additional file: Figure 11. Time evolution of the main interactions occurring between GPR17 and MRS2179 during 3 ns of MD simulation.** Plots show the distances between donor/acceptor groups of atoms involved in H-bonds or electrostatic interactions within the ligand-receptor complex. Panel a plots the distances between Arg255 (TM6) and both the 3' and 5' phosphates (in black and red, respectively). In analogy with the agonist binding mode the trend of these distances suggests the formation of electrostatic interactions between the oppositely charged phosphate and guanidine groups. Panel b shows the possible H-bonds engaged by the phosphate groups during the simulation: Tyr116 (TM3) and His252 (TM6) formed stable H-bond interactions with the 3'-phosphate (in red and blue, respectively). In the receptor-antagonist complex the tendency of Gln183 (EL2) to point toward TM helices were even more pronounced with respect to the agonist-receptor complex (Additional file: Figure 10) Here, Gln183 could form a H-bond with the 3'-phosphate as showed by the green plot. Tyr112 shifted its sidechain away from the binding cluster, thus permitting the accommodation of the 3'-phosphate (black plot). In Panel c, the distances between adenine moiety and facing residues of the binding pocket are reported: both the N6 and the N7 of the adenine ring could interact with Arg87 (TM2) via H-bond (in red and black, respectively), while the N1 of the adenine ring could interact with Asn114 (TM3) (in green).

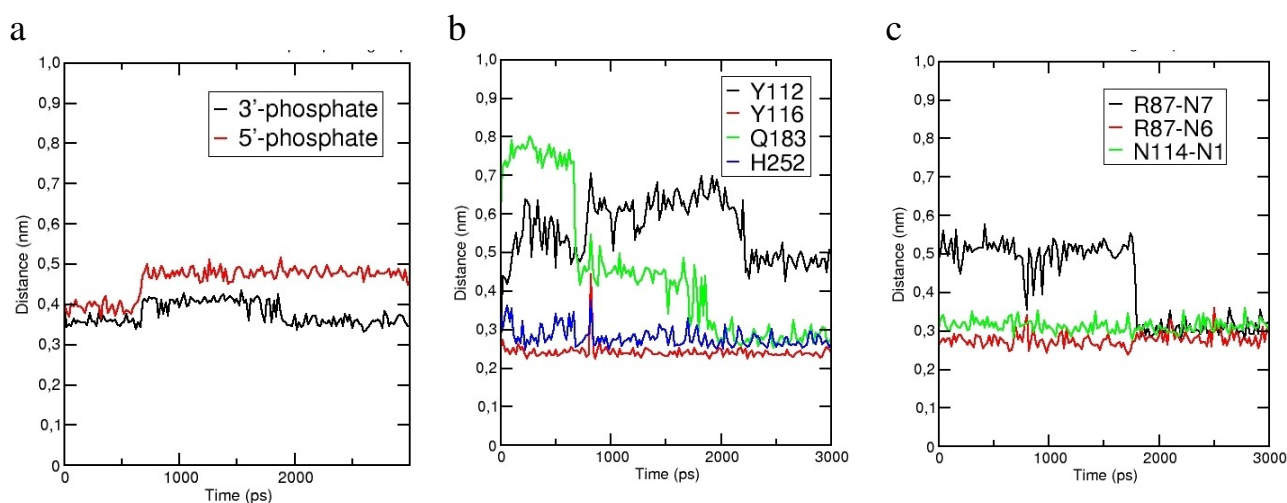

**Additional file: Figure 12. Time evolution of the main interactions occurring between GPR17 and cangrelor during 6 ns of MD simulation.** Plots show the distances between donor/acceptor groups of atoms involved in H-bonds or electrostatic interactions within the ligand-receptor complex. Panels a, b and c plot the distances between the residues in the binding pocket and the  $\alpha$ ,  $\beta$  and  $\gamma$  phosphate groups of cangrelor, respectively. In analogy with UDP and MRS2179, the main interactions involved the oppositely charged phosphate (mainly the  $\alpha$ -phosphate) and the basic residues Arg255. In addition also Arg186 (EL2) formed electrostatic interaction with the  $\gamma$ -phosphate of cangrelor. In Panel d, distances between the adenine moiety and the facing residues of the binding pocket are reported: as for MRS2179, the N6 of the adenine ring could interact with Arg87 (TM2) via H-bond (in green). The same applies to the N1 of the adenine ring (in red), while the N7 interacted with Gln183 (EL2) (in grey).

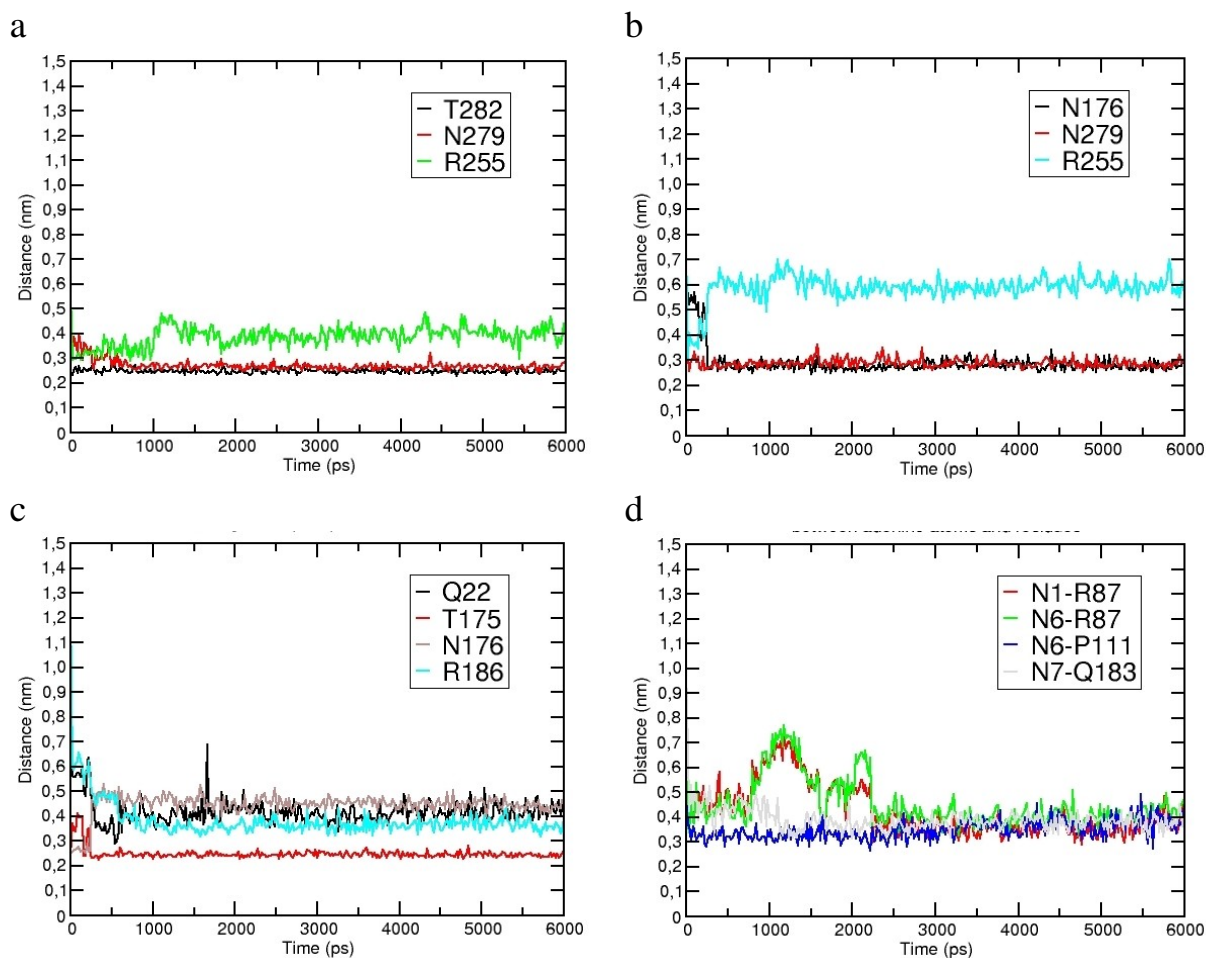

Supplement: 1471-2105-9-263-S1.pdf [file 1471-2105-9-263-S1.pdf]
